# Supplementary material for: Het verbeteren van de suboptimale samenwerkingen van Plegt-Vos wonen BV met haar leveranciers door het koppelen van platformtechnologie en inkoopmanagement
Source: MDPI journal article supplement (doi:10.3390/molecules27092769), 2010-01-01
Supplement: s1 [file s1]

# Phosphorus Fertilizers from Sewage Sludge Ash and Animal Blood as an Example of Biobased Environment-Friendly Agrochemicals: Findings from Field Experiments

Magdalena Jastrzębska <sup>1, \*</sup>, Marta K. Kostrzewska <sup>1</sup> and Agnieszka Saeid

<sup>1</sup> Department of Agroecosystems and Horticulture, Faculty of Agriculture and Forestry, University of Warmia and Mazury in Olsztyn, Plac Łódzki 3, 10-718 Olsztyn, Poland; marta.kostrzewska@uwm.edu.pl (M.K.K.)

<sup>2</sup> Department of Engineering and Technology of Chemical Processes, Faculty of Chemistry, Wrocław University of Science and Technology, Wyspiańskiego 42, 50-376 Wrocław, Poland; agnieszka.saeid@pwr.edu.pl (A.S.)

\* Correspondence: jama@uwm.edu.pl (M.J.)

## Supplementary information

**Table S1.** Basic agricultural information for the experiments.

| Item                   | Experiment                                                                      |                                                                                                         |                                                                                                                                  |
|------------------------|---------------------------------------------------------------------------------|---------------------------------------------------------------------------------------------------------|----------------------------------------------------------------------------------------------------------------------------------|
|                        | SW-2016                                                                         | SW-2017                                                                                                 | WW-2017                                                                                                                          |
| Wheat cultivar         | Monsun                                                                          | Monsun                                                                                                  | Julius                                                                                                                           |
| Previous crop          | winter rape                                                                     | spring wheat                                                                                            | winter wheat                                                                                                                     |
| Soil tillage system    | plough tillage                                                                  | plough tillage                                                                                          | plough tillage                                                                                                                   |
| Fertilization          |                                                                                 |                                                                                                         |                                                                                                                                  |
| K, kg ha <sup>-1</sup> | 83 <sup>1</sup><br>potassium chloride                                           | 83 <sup>1</sup><br>potassium chloride                                                                   | 83 <sup>1</sup><br>potassium chloride                                                                                            |
| N, kg ha <sup>-1</sup> | 130 (60 <sup>1</sup> + 50 <sup>3</sup> + 20 <sup>4</sup> )<br>ammonium sulphate | 110 (60 <sup>1</sup> + 50 <sup>3</sup> )<br>ammonium sulphate                                           | 150 (80 <sup>2</sup> + 50 <sup>3</sup> + 20 <sup>4</sup> )<br>ammonium nitrate <sup>2</sup><br>ammonium sulphate <sup>3, 4</sup> |
| Plant protection       |                                                                                 |                                                                                                         |                                                                                                                                  |
| –Herbicides            | florasulam + 2,4-D (29 May)                                                     | florasulam + 2,4-D (22 May)                                                                             | florasulam + 2,4-D (13 May)                                                                                                      |
| –Fungicides            | thiophanate-methyl + tetraconazole (9 June)<br>azoxystrobin (8 July)            | thiophanate-methyl + tetraconazole (6 June)<br>azoxystrobin + (propiconazole + cyproconazole) (28 June) | fenpropimorph + epoxiconazole + metrafenone (16 May)<br>fluxapyroxad + pyraclostrobin + epoxiconazole (8 June)                   |
| –Insecticides          | lambda-cyhalothrin (6 June)                                                     | deltamethrin (6 June)                                                                                   | deltamethrin (6 June)                                                                                                            |
| –Growth regulators     | –                                                                               | –                                                                                                       | trinexapac-ethyl (16 May)                                                                                                        |
| Sowing date            | 21 April 2016                                                                   | 20 April 2017                                                                                           | 4 October 2016                                                                                                                   |
| Harvest date           | 12 August 2016                                                                  | 18 August 2017                                                                                          | 4 August 2017                                                                                                                    |

<sup>1</sup> pre-sowing, <sup>2</sup> at post-winter vegetation start, <sup>3</sup> at wheat stem elongation, <sup>4</sup> at wheat heading; – not applied.

**Table S2.** Atmospheric precipitation and air temperature during the study period according to the Meteorological Station in Bałczyn, Poland.

| Year                          | Days    | Month |      |      |      |      |       |       |      |      |      |      |      |
|-------------------------------|---------|-------|------|------|------|------|-------|-------|------|------|------|------|------|
|                               |         | I     | II   | III  | IV   | V    | VI    | VII   | VIII | IX   | X    | XI   | XII  |
| Atmospheric precipitation, mm |         |       |      |      |      |      |       |       |      |      |      |      |      |
| 2016                          | 1-10    |       |      | 0.6  | 4.8  | 7.5  | 12.1  | 39.6  | 54.5 | 7.5  | 65.1 | 39.9 | 41.4 |
|                               | 11-20   |       |      | 7.0  | 19.2 | 53.7 | 28.1  | 34.0  | 10.4 | 1.2  | 9.2  | 27.7 | 19.2 |
|                               | 21-31   |       |      | 12.9 | 9.1  | 9.6  | 26.1  | 65.0  | 7.0  | 8.4  | 22.0 | 10.6 | 17.2 |
|                               | Total   |       |      | 20.5 | 33.1 | 70.8 | 66.3  | 138.6 | 71.9 | 17.1 | 96.3 | 78.2 | 77.8 |
| 2017                          | 1-10    | 8.2   | 3.8  | 24.3 | 7.7  | 27.5 | 16.6  | 29.4  | 31.6 |      |      |      |      |
|                               | 11-20   | 7.5   | 14.0 | 18.6 | 30.8 | 2.3  | 29.7  | 20.7  | 11.7 |      |      |      |      |
|                               | 21-31   | 0.1   | 22.7 | 10.1 | 13.6 | 4.2  | 63.6  | 56.0  | 11.5 |      |      |      |      |
|                               | Total   | 15.8  | 40.5 | 53.0 | 52.1 | 34.0 | 109.9 | 106.1 | 54.8 |      |      |      |      |
| 1981-2010                     | Total   | 30.1  | 23.1 | 30.7 | 29.8 | 62.3 | 72.9  | 81.2  | 70.6 | 56.2 | 51.2 | 46.1 | 42.6 |
| Air temperature, °C           |         |       |      |      |      |      |       |       |      |      |      |      |      |
| 2016                          | 1-10    |       |      | 2.9  | 10.3 | 14.1 | 16.4  | 17.5  | 17.7 | 17.5 | 9.0  | 2.7  | 1.9  |
|                               | 11-20   |       |      | 2.2  | 9.1  | 11.8 | 16.3  | 18.1  | 15.6 | 15.1 | 5.7  | 2.7  | -0.3 |
|                               | 21-31   |       |      | 5.5  | 6.9  | 18.5 | 21.3  | 19.9  | 19.3 | 11.7 | 6.1  | 2.1  | 1.4  |
|                               | Average |       |      | 3.6  | 8.8  | 14.9 | 18.0  | 18.5  | 17.6 | 14.7 | 6.9  | 2.5  | 1.0  |
| 2017                          | 1-10    | -6.0  | -4.3 | 3.7  | 9.8  | 8.5  | 15.5  | 16.0  | 20.8 |      |      |      |      |
|                               | 11-20   | -2.2  | -2.2 | 4.3  | 4.3  | 14.9 | 17.4  | 17.2  | 19.2 |      |      |      |      |
|                               | 21-31   | -1.6  | 3.5  | 7.0  | 6.1  | 15.7 | 17.2  | 18.5  | 16.3 |      |      |      |      |
|                               | Average | -3.2  | -1.2 | 5.1  | 6.7  | 13.1 | 16.7  | 17.3  | 18.7 |      |      |      |      |
| 1981-2010                     | Average | -2.4  | -1.6 | 1.8  | 7.7  | 13.2 | 15.8  | 18.3  | 17.7 | 13.0 | 8.1  | 2.8  | -1.0 |

**Table S3.** Microbiological culture media composition.

| Culture medium                       | Components                      | Concentration, g L <sup>-1</sup> | pH      |
|--------------------------------------|---------------------------------|----------------------------------|---------|
| Tryptic Soy Agar (TSA)               | trypticase peptone              | 15.0                             | 7.3-7.5 |
|                                      | papaic digest of soyabean meal  | 5.0                              |         |
|                                      | NaCl                            | 5.0                              |         |
|                                      | agar                            | 15.0                             |         |
| Rose-Bengal<br>Chloramphenicol (RBC) | mycological peptone             | 5.0                              | 7.2     |
|                                      | glucose                         | 10.0                             |         |
|                                      | KH <sub>2</sub> PO <sub>4</sub> | 1.0                              |         |
|                                      | MgSO <sub>4</sub>               | 0.5                              |         |
|                                      | rose bengal                     | 0.05                             |         |
|                                      | chloramphenicol                 | 0.1                              |         |
|                                      | agar                            | 15.5                             |         |

## Discussion on seasonal changes in soil pH in the experiments

In experiment SW-2017, the decrease in pH at wheat tillering was likely caused by root activity in response to insufficient available P in the soil. Despite the initial soil pH indicating high availability of P compounds, at this phase of high plant demand for P [1], the rate of its release from the soil pool and from fertilizers seems to have been too slow under conditions of scanty precipitation occurring at that time (11-31 May)(Table S2). Under such circumstances, plant roots exude organic acids that increase

the solubility of P bonded to aluminum (Al), iron (Fe) and manganese (Mn) oxides [2]. In earlier studies by Jastrzębska et al. [3], when weather conditions were more favorable, lowering of soil pH at the wheat early development stages due to plant root activity occurred under no P treatments and after the application of P in the form of phosphorite and SSA-water solution, i.e. less soluble compounds. In turn, the increase in soil pH noted after wheat harvest was probably mostly related to the intensive plant uptake of anions, mainly nitrates ( $\text{NO}_3^-$ ), during vegetation followed by the release of bicarbonate ( $\text{HCO}_3^-$ ) or hydroxyl ions ( $\text{OH}^-$ ) to maintain electrical neutrality at the soil-root interface [4,5].

In experiment WW-2017, the increase in soil pH at winter wheat tillering (spring) was most probably caused by the first part of the N dose applied a little earlier (at post-winter vegetation start) in the form of ammonium nitrate mixed with dolomite meal. A substantial amount of N ( $80 \text{ kg ha}^{-1}$ ; see Table 3) was also accompanied by a correspondingly large amount of calcium (Ca). After wheat harvest, there were no more significant changes in soil pH compared to the previous analysis term, indicating a balancing of biogeochemical processes affecting this soil property [5].

**Table S4.** Reference values for soil PTE content,  $\text{mg kg}^{-1}$  of soil DM.

| Content                              | As       | Cd        | Cr        | Ni       | Pb       | Reference |
|--------------------------------------|----------|-----------|-----------|----------|----------|-----------|
| Geochemical background for Poland    | 2–13     | 0.03–1.00 | 2.0–64    | 0.5–28.5 | 5.0–59.0 | [6,7]     |
| In surface level of Polish soils     | 0.6–35   | 0.01–1.6  | 5–100     | 0.5–60   | 5–85     | [8]       |
| Permissible in Poland in arable land | 10       | 2         | 150       | 100      | 100      | [9]       |
| Monitoring of arable soils           | – Poland | 0.73–20.7 | 0.02–68.0 | 2.4–49.1 | 1.0–71.1 | 4.5–857   |
|                                      | – region | 1.52–3.87 | 0.07–0.18 | 4.5–30.6 | 2.6–29.8 | 7.6–14.4  |

## References

- Grzebisz, W.; Potarzycki, J.; Biber, M.; Szczepaniak, W. Reakcja roślin uprawnych na nawożenie fosforem [Response of agricultural crops to nitrogen fertilization]. *J. Elem.* **2003**, *8*, 83–93.
- Balemi, T.; Negisho, K. Management of soil phosphorus and plant adaptation mechanisms to phosphorus stress for sustainable crop production: A review. *J. Soil Sci. Plant Nutr.* **2012**, *12*, 547–561.
- Jastrzębska, M.; Kostrzewska, M.; Treder, K.; Jastrzębski, W.; Makowski, P. Phosphorus biofertilizers from ash and bones—agronomic evaluation of functional properties. *J. Agric. Sci.* **2016**, *8*, 58–70, doi:10.5539/jas.v8n6p58.
- Hinsinger, P.; Plassard, C.; Tang, C.; Jaillard, B. Origins of root-mediated pH changes in the rhizosphere and their responses to environmental constraints: a review. *Plant Soil* **2003**, *248*, 43–59, doi:10.1023/A:1022371130939.
- Neina, D. The Role of Soil pH in Plant Nutrition and Soil Remediation. *Appl. Environ. Soil Sci.* **2019**, *2019*, 5794869, doi:10.1155/2019/5794869.
- Kucharczak-Moryl, E.; Moryl, A.; Żmuda, R. Influence of the environment on the content of arsenic in cultivated soils in Zgorzelec-Bogatynia region. *Inż. Ekol.* **2014**, *2014*, 107–116.
- Czarnowska, K. Total content of heavy metals in parent rocks as reference background levels of soils. *Rocz. Glebozn.* **1996**, *47*, 43–50.
- Kabata-Pendias, A.; Pendias, H. *Biogeochemistry of trace elements*; Polish Scientific Publishing Company: Warsaw, Poland, 1999.
- ME-PL. Ordinance by the Minister of the Environment (Poland) of 1 September 2016 on assessment procedures for the land surface pollution. *J. Laws* **2016**, *2016*, 1395.
- IUNG. *The monitoring of the chemistry of the Polish arable soils*; Institute of Soil Science and Plant Cultivation: Puławy, Poland, 2017.
